# Supplementary material for: Carbonyl Composition and Electrophilicity in Vaping Emissions of Flavored and Unflavored E-Liquids
Source: MDPI journal article supplement (doi:10.3390/toxics9120345), 2021-12-09
Supplement: s1 [file s1]

# Supplementary Materials: Carbonyl Composition and Electrophilicity in Vaping Emissions of Flavored and Unflavored E-Liquids

Jin Y. Chen, Alexa Canchola, and Ying-Hsuan Lin

Table S1. Optimized geometries of target carbonyls calculated by DFT/B3LYP/6-311+G(d, p) level of theory and in water solvation using Gaussian 16W program.

| Formaldehyde                                                                         |           |           |          |
|--------------------------------------------------------------------------------------|-----------|-----------|----------|
| Charge = 0                                                                           |           |           |          |
| E(UB3LYP) = −114.432708094 Hartree (Eh)                                              |           |           |          |
| Electronic state: 1-A                                                                |           |           |          |
| Cartesian Coordinates (Angstroms):                                                   |           |           |          |
| O                                                                                    | −0.000041 | 0.676752  | 0.000000 |
| C                                                                                    | −0.000041 | −0.531376 | 0.000000 |
| H                                                                                    | −0.938433 | −1.112848 | 0.000000 |
| H                                                                                    | 0.939008  | −1.112912 | 0.000000 |
| 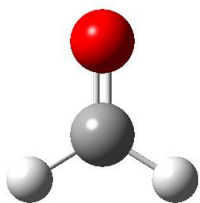  |           |           |          |
|                                                                                      |           |           |          |
| Charge = −1                                                                          |           |           |          |
| E(UB3LYP) = −114.624580950 Hartree (Eh)                                              |           |           |          |
| Electronic state: 1-A                                                                |           |           |          |
| Cartesian Coordinates (Angstroms):                                                   |           |           |          |
| O                                                                                    | −0.000009 | 0.727861  | 0.000000 |
| C                                                                                    | −0.000009 | −0.584091 | 0.000000 |
| H                                                                                    | −0.936931 | −1.159157 | 0.000000 |
| H                                                                                    | 0.937051  | −1.159186 | 0.000000 |
| Charge = +1                                                                          |           |           |          |
| E(UB3LYP) = −114.160019523 Hartree (Eh)                                              |           |           |          |
| Electronic state: 1-A                                                                |           |           |          |
| Cartesian Coordinates (Angstroms):                                                   |           |           |          |
| O                                                                                    | −0.000105 | 0.663897  | 0.000000 |
| C                                                                                    | −0.000105 | −0.522196 | 0.000000 |
| H                                                                                    | −0.962402 | −1.089947 | 0.000000 |
| H                                                                                    | 0.963872  | −1.088057 | 0.000000 |
| Acetaldehyde                                                                         |           |           |          |
| Charge = 0                                                                           |           |           |          |
| E(UB3LYP) = −153.354522985 Hartree (Eh)                                              |           |           |          |
| Electronic state: 1-A                                                                |           |           |          |
| Cartesian Coordinates (Angstroms):                                                   |           |           |          |
| C                                                                                    | 0.000000  | 0.471652  | 0.000000 |
| O                                                                                    | −1.207923 | 0.355997  | 0.000000 |
| C                                                                                    | 0.949642  | −0.693883 | 0.000000 |
| H                                                                                    | 0.452229  | 1.482132  | 0.000000 |
| H                                                                                    | 1.989744  | −0.367922 | 0.000000 |
|  |           |           |          |
|                                                                                      |           |           |          |

---

|   |          |           |           |
|---|----------|-----------|-----------|
| H | 0.761779 | -1.314399 | 0.881325  |
| H | 0.761779 | -1.314399 | -0.881325 |

Charge = -1

E(UB3LYP) = -153.370677836 Hartree (Eh)

Electronic state: 1-A

Cartesian Coordinates (Angstroms):

|   |           |           |           |
|---|-----------|-----------|-----------|
| C | 0.000000  | 0.497419  | 0.000000  |
| O | -1.293321 | 0.239851  | 0.000000  |
| C | 1.016429  | -0.611764 | 0.000000  |
| H | 0.360356  | 1.536615  | 0.000000  |
| H | 2.038719  | -0.214048 | 0.000000  |
| H | 0.924458  | -1.277656 | 0.878966  |
| H | 0.924458  | -1.277656 | -0.878966 |

Charge = +1

E(UB3LYP) = -153.102042126 Hartree (Eh)

Electronic state: 1-A

Cartesian Coordinates (Angstroms):

|   |           |           |           |
|---|-----------|-----------|-----------|
| C | 0.000000  | 0.451208  | 0.000000  |
| O | -1.192126 | 0.398092  | 0.000000  |
| C | 0.949359  | -0.730416 | 0.000000  |
| H | 0.434009  | 1.484123  | 0.000000  |
| H | 1.968672  | -0.358366 | 0.000000  |
| H | 0.719088  | -1.317621 | 0.893620  |
| H | 0.719088  | -1.317621 | -0.893620 |

---

### Acrolein

---

Charge = 0

E(UB3LYP) = -191.183387804 Hartree (Eh)

Electronic state: 1-A

Cartesian Coordinates (Angstroms):

|   |           |           |          |
|---|-----------|-----------|----------|
| C | -1.214748 | 1.279427  | 0.000000 |
| C | 0.000000  | 0.719262  | 0.000000 |
| C | 0.148409  | -0.739513 | 0.000000 |
| O | 1.219144  | -1.322395 | 0.000000 |
| H | -2.112691 | 0.668793  | 0.000000 |
| H | -1.351926 | 2.354067  | 0.000000 |
| H | 0.910131  | 1.311027  | 0.000000 |
| H | -0.800630 | -1.309782 | 0.000000 |

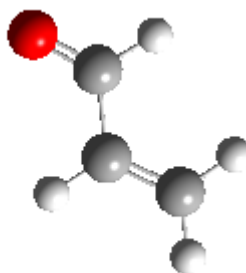

Charge = -1

E(UB3LYP) = -191.208242254 Hartree (Eh)

Electronic state: 1-A

Cartesian Coordinates (Angstroms):

|   |           |           |          |
|---|-----------|-----------|----------|
| C | -1.186351 | 1.404274  | 0.000000 |
| C | 0.000000  | 0.667011  | 0.000000 |
| C | 0.114150  | -0.735584 | 0.000000 |
| O | 1.208609  | -1.417489 | 0.000000 |
| H | -2.156618 | 0.915291  | 0.000000 |

---

---

|   |           |           |          |
|---|-----------|-----------|----------|
| H | -1.178328 | 2.487565  | 0.000000 |
| H | 0.944178  | 1.215554  | 0.000000 |
| H | -0.844904 | -1.292697 | 0.000000 |

Charge = +1

E(UB3LYP) = -190.930698073 Hartree (Eh)

Electronic state: 1-A

Cartesian Coordinates (Angstroms):

|   |           |           |          |
|---|-----------|-----------|----------|
| C | -0.923399 | 1.490212  | 0.000000 |
| C | 0.172970  | 0.709976  | 0.000000 |
| C | 0.000000  | -0.719132 | 0.000000 |
| O | 0.885347  | -1.559127 | 0.000000 |
| H | -1.930249 | 1.090204  | 0.000000 |
| H | -0.813474 | 2.568501  | 0.000000 |
| H | 1.188085  | 1.083768  | 0.000000 |
| H | -1.024564 | -1.155795 | 0.000000 |

---

### Benzaldehyde

---

Charge = 0

E(UB3LYP) = -345.676360401 Hartree (Eh)

Electronic state: 1-A

Cartesian Coordinates (Angstroms):

|   |           |           |           |
|---|-----------|-----------|-----------|
| O | 2.854181  | -0.391611 | -0.000078 |
| C | 1.986641  | 0.463916  | 0.000076  |
| C | 0.535584  | 0.200982  | 0.000040  |
| C | 0.034053  | -1.109905 | 0.000036  |
| C | -0.349770 | 1.286844  | 0.000010  |
| C | -1.337636 | -1.325852 | 0.000002  |
| C | -1.725199 | 1.067938  | -0.000021 |
| C | -2.217196 | -0.237321 | -0.000027 |
| H | 2.262757  | 1.535775  | -0.000056 |
| H | 0.728135  | -1.941920 | 0.000060  |
| H | 0.042746  | 2.298463  | 0.000017  |
| H | -1.728700 | -2.336551 | 0.000000  |
| H | -2.409849 | 1.907725  | -0.000044 |
| H | -3.287394 | -0.410225 | -0.000052 |

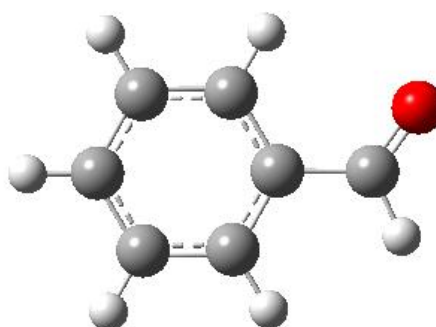

Charge = -1

E(UB3LYP) = -345.763742749 Hartree (Eh)

Electronic state: 1-A

Cartesian Coordinates (Angstroms):

|   |           |           |           |
|---|-----------|-----------|-----------|
| O | 2.905663  | -0.399770 | -0.000288 |
| C | 1.972124  | 0.479781  | 0.000285  |
| C | 0.571895  | 0.221027  | 0.000170  |
| C | 0.032434  | -1.108894 | 0.000139  |
| C | -0.377215 | 1.294520  | 0.000046  |
| C | -1.336634 | -1.327406 | 0.000006  |
| C | -1.739152 | 1.059533  | -0.000084 |
| C | -2.249060 | -0.257790 | -0.000107 |
| H | 2.251592  | 1.550684  | -0.000317 |
| H | 0.718860  | -1.948297 | 0.000218  |

---

---

|   |           |           |           |
|---|-----------|-----------|-----------|
| H | -0.007260 | 2.317049  | 0.000055  |
| H | -1.710758 | -2.347931 | -0.000009 |
| H | -2.426349 | 1.900977  | -0.000163 |
| H | -3.317749 | -0.438952 | -0.000207 |

Charge = +1

E(UB3LYP) = -345.403731647 Hartree (Eh)

Electronic state: 1-A

Cartesian Coordinates (Angstroms):

|   |           |           |           |
|---|-----------|-----------|-----------|
| O | 2.820665  | -0.456620 | -0.000006 |
| C | 2.032758  | 0.460995  | 0.000007  |
| C | 0.555395  | 0.250624  | 0.000003  |
| C | 0.029491  | -1.077953 | 0.000004  |
| C | -0.313875 | 1.310038  | 0.000002  |
| C | -1.375061 | -1.320978 | -0.000001 |
| C | -1.725245 | 1.063451  | -0.000007 |
| C | -2.243289 | -0.258955 | 0.000003  |
| H | 2.360204  | 1.513283  | -0.000007 |
| H | 0.725059  | -1.909611 | -0.000001 |
| H | 0.044530  | 2.332454  | 0.000002  |
| H | -1.735073 | -2.341198 | -0.000013 |
| H | -2.406862 | 1.905372  | -0.000010 |
| H | -3.314216 | -0.410675 | 0.000011  |

---

*trans*-2-Hexenal

---

Charge = 0

E(UB3LYP) = -309.958896545 Hartree (Eh)

Electronic state: 1-A

Cartesian Coordinates (Angstroms):

|   |           |           |           |
|---|-----------|-----------|-----------|
| C | -2.638669 | 0.319521  | -0.003206 |
| C | -1.357376 | -0.374257 | 0.034723  |
| C | -0.244343 | 0.262892  | 0.436141  |
| C | 1.123625  | -0.329315 | 0.513109  |
| C | 2.148214  | 0.426447  | -0.358354 |
| C | 3.559730  | -0.152190 | -0.233532 |
| O | -3.695828 | -0.186820 | -0.351412 |
| H | -2.609234 | 1.380353  | 0.313763  |
| H | -1.342381 | -1.416907 | -0.270720 |
| H | -0.330353 | 1.310276  | 0.726660  |
| H | 1.459484  | -0.282706 | 1.557916  |
| H | 1.095248  | -1.385688 | 0.229712  |
| H | 1.823340  | 0.389462  | -1.403455 |
| H | 2.154769  | 1.483431  | -0.070627 |
| H | 4.264537  | 0.396518  | -0.863782 |
| H | 3.919126  | -0.096430 | 0.798560  |
| H | 3.584988  | -1.202335 | -0.540017 |

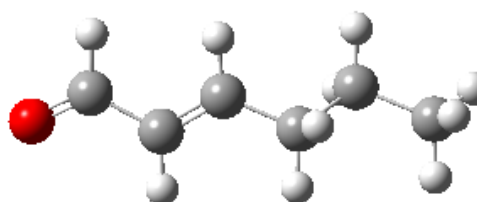

Charge = -1

E(UB3LYP) = -310.031522249 Hartree (Eh)

Electronic state: 1-A

Cartesian Coordinates (Angstroms):

---

---

|   |           |           |           |
|---|-----------|-----------|-----------|
| C | -2.672951 | 0.253138  | -0.140291 |
| C | -1.376611 | -0.190528 | 0.179681  |
| C | -0.218484 | 0.587608  | 0.257114  |
| C | 1.141394  | 0.052921  | 0.604013  |
| C | 2.185152  | 0.156002  | -0.529532 |
| C | 3.574874  | -0.343986 | -0.121547 |
| O | -3.744389 | -0.471509 | -0.209510 |
| H | -2.768165 | 1.337295  | -0.353498 |
| H | -1.280673 | -1.259051 | 0.391294  |
| H | -0.288957 | 1.655873  | 0.049252  |
| H | 1.558396  | 0.580524  | 1.478330  |
| H | 1.054235  | -0.999730 | 0.904042  |
| H | 1.825427  | -0.412510 | -1.395260 |
| H | 2.252955  | 1.201015  | -0.855850 |
| H | 4.290784  | -0.258109 | -0.944386 |
| H | 3.968415  | 0.231434  | 0.723064  |
| H | 3.542453  | -1.395604 | 0.182461  |

Charge = +1

E(UB3LYP) = -309.687393075 Hartree (Eh)

Electronic state: 1-A

Cartesian Coordinates (Angstroms):

|   |           |           |           |
|---|-----------|-----------|-----------|
| C | -2.585359 | 0.294347  | 0.004884  |
| C | -1.349933 | -0.406959 | 0.009250  |
| C | -0.239085 | 0.250077  | 0.441860  |
| C | 1.106798  | -0.350496 | 0.499560  |
| C | 2.133001  | 0.453198  | -0.344018 |
| C | 3.536416  | -0.145962 | -0.233474 |
| O | -3.682338 | -0.140600 | -0.344444 |
| H | -2.622612 | 1.354055  | 0.336706  |
| H | -1.347230 | -1.434081 | -0.332454 |
| H | -0.330998 | 1.285572  | 0.762097  |
| H | 1.426822  | -0.312376 | 1.550862  |
| H | 1.086097  | -1.397333 | 0.190107  |
| H | 1.808354  | 0.456420  | -1.388058 |
| H | 2.139440  | 1.493539  | -0.006288 |
| H | 4.241349  | 0.428485  | -0.839553 |
| H | 3.891547  | -0.134177 | 0.800658  |
| H | 3.554909  | -1.180531 | -0.586898 |

---

Table S2. Condensed Fukui parameters ( $f_k^0$ ,  $f_k^-$ ,  $f_k^+$ , and dual-descriptor) calculated using NPA data by UCA-Fukui software.

| Atom            | NPA<br>neutral | NPA<br>anion | NPA<br>cation | $f_k^-$ | $f_k^+$ | $f_k^0$ | Dual descriptor |
|-----------------|----------------|--------------|---------------|---------|---------|---------|-----------------|
| Formaldehyde    |                |              |               |         |         |         |                 |
| O               | −0.5521        | −0.8986      | 0.0149        | 0.5670  | 0.3465  | 0.4568  | −0.2205         |
| C               | 0.3153         | −0.2770      | 0.3305        | 0.0152  | 0.5923  | 0.3037  | 0.5771          |
| H               | 0.1184         | 0.0878       | 0.3272        | 0.2088  | 0.0306  | 0.1197  | −0.1782         |
| H               | 0.1184         | 0.0878       | 0.3274        | 0.2090  | 0.0306  | 0.1198  | −0.1785         |
| Acetaldehyde    |                |              |               |         |         |         |                 |
| C               | 0.4636         | −0.0180      | 0.4809        | 0.0172  | 0.4817  | 0.2494  | 0.4644          |
| O               | −0.5898        | −0.9263      | −0.0454       | 0.5445  | 0.3365  | 0.4405  | −0.2080         |
| C               | −0.6949        | −0.6606      | −0.6248       | 0.0702  | −0.0343 | 0.0179  | −0.0358         |
| H               | 0.1196         | 0.0842       | 0.3307        | 0.2110  | 0.0354  | 0.1232  | −0.1756         |
| H               | 0.2206         | 0.1893       | 0.2707        | 0.0501  | 0.0313  | 0.0407  | −0.0188         |
| H               | 0.2405         | 0.1657       | 0.2940        | 0.0535  | 0.0747  | 0.0641  | 0.0212          |
| H               | 0.2405         | 0.1657       | 0.2940        | 0.0535  | 0.0747  | 0.0641  | 0.0212          |
| Acrolein        |                |              |               |         |         |         |                 |
| C               | −0.2567        | −0.5583      | −0.0798       | 0.1769  | 0.3016  | 0.2392  | 0.1246          |
| C               | −0.3109        | −0.3792      | −0.3171       | −0.0063 | 0.0684  | 0.031   | 0.0621          |
| C               | 0.4033         | 0.1652       | 0.3788        | −0.0245 | 0.238   | 0.1068  | 0.2136          |
| O               | −0.5864        | −0.8367      | −0.036        | 0.5504  | 0.2503  | 0.4003  | −0.3001         |
| H               | 0.1989         | 0.169        | 0.2262        | 0.0272  | 0.0299  | 0.0286  | 0.0027          |
| H               | 0.2086         | 0.1774       | 0.2371        | 0.0285  | 0.0313  | 0.0299  | 0.0028          |
| H               | 0.2198         | 0.1766       | 0.2731        | 0.0534  | 0.0432  | 0.0483  | −0.0102         |
| H               | 0.1233         | 0.0859       | 0.3177        | 0.1944  | 0.0374  | 0.1159  | −0.157          |
| Benzaldehyde    |                |              |               |         |         |         |                 |
| O               | −0.5885        | −0.8144      | −0.5189       | 0.0696  | 0.2260  | 0.1564  | −0.3404         |
| C               | 0.4320         | 0.1894       | 0.4330        | 0.0010  | 0.2426  | 0.2416  | 0.1945          |
| C               | −0.1804        | −0.1998      | −0.1452       | 0.0352  | 0.0194  | −0.0157 | 0.0129          |
| C               | −0.1554        | −0.2622      | 0.1126        | 0.2681  | 0.1067  | −0.1614 | 0.0780          |
| C               | −0.1572        | −0.2296      | −0.0936       | 0.0636  | 0.0724  | 0.0088  | 0.0173          |
| C               | −0.2082        | −0.2243      | −0.1296       | 0.0786  | 0.0161  | −0.0625 | −0.0080         |
| C               | −0.2122        | −0.2422      | 0.0807        | 0.2928  | 0.0300  | −0.2628 | 0.0203          |
| C               | −0.1686        | −0.3120      | −0.1507       | 0.0179  | 0.1435  | 0.1256  | 0.0809          |
| H               | 0.1267         | 0.0942       | 0.1546        | 0.0279  | 0.0325  | 0.0046  | −0.1421         |
| H               | 0.2266         | 0.2038       | 0.2483        | 0.0217  | 0.0229  | 0.0012  | 0.0085          |
| H               | 0.2217         | 0.1970       | 0.2554        | 0.0337  | 0.0247  | −0.0090 | 0.0042          |
| H               | 0.2212         | 0.1993       | 0.2543        | 0.0331  | 0.0219  | −0.0112 | 0.0016          |
| H               | 0.2219         | 0.2005       | 0.2437        | 0.0218  | 0.0215  | −0.0003 | 0.0024          |
| H               | 0.2203         | 0.2004       | 0.2554        | 0.0352  | 0.0199  | −0.0153 | 0.0082          |
| trans-2-Hexenal |                |              |               |         |         |         |                 |
| C               | 0.4029         | 0.1602       | 0.3721        | −0.0307 | 0.2426  | 0.1059  | 0.2119          |
| C               | −0.3295        | −0.3857      | −0.3162       | 0.0133  | 0.0563  | 0.0348  | 0.0430          |
| C               | −0.0420        | −0.3039      | 0.0912        | 0.1332  | 0.2619  | 0.1976  | 0.1287          |
| C               | −0.4341        | −0.4094      | −0.4456       | −0.0116 | −0.0247 | 0.0181  | 0.0131          |
| C               | −0.3755        | −0.3794      | −0.3722       | 0.0034  | 0.0039  | 0.0036  | 0.0005          |
| C               | −0.5761        | −0.5803      | −0.5745       | 0.0016  | 0.0042  | 0.0029  | 0.0026          |
| O               | −0.6050        | −0.8196      | −0.0606       | 0.5443  | 0.2146  | 0.3795  | −0.3298         |
| H               | 0.1202         | 0.0676       | 0.3094        | 0.1892  | 0.0526  | 0.1209  | −0.1366         |
| H               | 0.2142         | 0.1757       | 0.2647        | 0.0505  | 0.0385  | 0.0445  | −0.0120         |
| H               | 0.2012         | 0.1615       | 0.2244        | 0.0233  | 0.0397  | 0.0315  | 0.0164          |
| H               | 0.2236         | 0.1781       | 0.2559        | 0.0323  | 0.0455  | 0.0389  | 0.0132          |
| H               | 0.2087         | 0.1871       | 0.2253        | 0.0166  | 0.0216  | 0.0191  | 0.0050          |
| H               | 0.1961         | 0.1842       | 0.2054        | 0.0093  | 0.0120  | 0.0106  | 0.0027          |
| H               | 0.1961         | 0.1847       | 0.2049        | 0.0088  | 0.0114  | 0.0101  | 0.0026          |
| H               | 0.2048         | 0.1964       | 0.2127        | 0.0078  | 0.0084  | 0.0081  | 0.0006          |
| H               | 0.1971         | 0.1914       | 0.2013        | 0.0042  | 0.0057  | 0.0050  | 0.0015          |
| H               | 0.1973         | 0.1915       | 0.2018        | 0.0044  | 0.0058  | 0.0051  | 0.0014          |

Table S3. Condensed Fukui function,  $f_k^-$ , of carbonyl compounds calculated using UCA-FUKUI software.

| $f_k^-$ (for electrophilic attack)   |                                                                                   |                                    |                                    |                             |                             |
|--------------------------------------|-----------------------------------------------------------------------------------|------------------------------------|------------------------------------|-----------------------------|-----------------------------|
| compound                             | structure                                                                         | O <sub>carbonyl</sub> <sup>1</sup> | C <sub>carbonyl</sub> <sup>2</sup> | C <sub>α</sub> <sup>3</sup> | C <sub>β</sub> <sup>4</sup> |
| simple carbonyl                      |                                                                                   |                                    |                                    |                             |                             |
| formaldehyde                         |  | 0.567                              | 0.0152                             | n/a                         | n/a                         |
| acetaldehyde                         |  | 0.5445                             | 0.0172                             | n/a                         | n/a                         |
| benzaldehyde                         |  | 0.0696                             | 0.0010                             | n/a                         | n/a                         |
| $\alpha,\beta$ -unsaturated carbonyl |                                                                                   |                                    |                                    |                             |                             |
| acrolein                             |  | 0.5504                             | −0.0245                            | −0.0063                     | 0.1769                      |
| <i>trans</i> -2-hexenal              |  | 0.5443                             | −0.0307                            | 0.0133                      | 0.1332                      |

Table S4. Condensed Fukui function,  $f_k^0$ , of carbonyl compounds calculated using UCA-FUKUI software.

| $f_k^0$ (for neutral/radical attack) |                                                                                     |                                    |                                    |                             |                             |
|--------------------------------------|-------------------------------------------------------------------------------------|------------------------------------|------------------------------------|-----------------------------|-----------------------------|
| compound                             | structure                                                                           | O <sub>carbonyl</sub> <sup>1</sup> | C <sub>carbonyl</sub> <sup>2</sup> | C <sub>α</sub> <sup>3</sup> | C <sub>β</sub> <sup>4</sup> |
| simple carbonyl                      |                                                                                     |                                    |                                    |                             |                             |
| formaldehyde                         |  | 0.4568                             | 0.3037                             | n/a                         | n/a                         |
| acetaldehyde                         |  | 0.4405                             | 0.2494                             | n/a                         | n/a                         |
| benzaldehyde                         |  | 0.1564                             | 0.2416                             | n/a                         | n/a                         |
| α,β-unsaturated carbonyl             |                                                                                     |                                    |                                    |                             |                             |
| acrolein                             |  | 0.4003                             | 0.1068                             | 0.031                       | 0.2392                      |
| <i>trans</i> -2-hexenal              |  | 0.3795                             | 0.1059                             | 0.0348                      | 0.1976                      |

Table S5. Condensed Fukui function, dual-descriptor, of carbonyl compounds calculated using UCA-FUKUI software.

| dual-descriptor          |                                                                                   |                                    |                                    |                             |                             |
|--------------------------|-----------------------------------------------------------------------------------|------------------------------------|------------------------------------|-----------------------------|-----------------------------|
| compound                 | structure                                                                         | O <sub>carbonyl</sub> <sup>1</sup> | C <sub>carbonyl</sub> <sup>2</sup> | C <sub>α</sub> <sup>3</sup> | C <sub>β</sub> <sup>4</sup> |
| simple carbonyl          |                                                                                   |                                    |                                    |                             |                             |
| formaldehyde             |  | −0.2205                            | 0.5771                             | n/a                         | n/a                         |
| acetaldehyde             |  | −0.2080                            | 0.4644                             | n/a                         | n/a                         |
| benzaldehyde             |  | −0.3403                            | 0.1945                             | n/a                         | n/a                         |
| α,β-unsaturated carbonyl |                                                                                   |                                    |                                    |                             |                             |
| acrolein                 |  | −0.3001                            | 0.2136                             | 0.0621                      | 0.1246                      |
| <i>trans</i> -2-hexenal  |  | −0.3298                            | 0.2119                             | 0.0430                      | 0.1287                      |



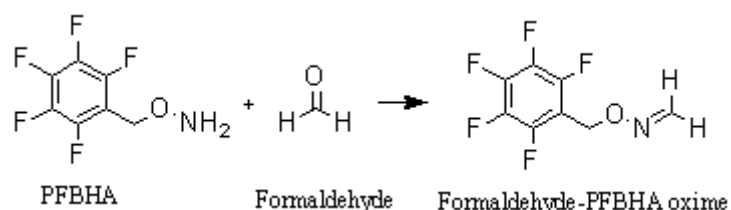

(A) Formaldehyde

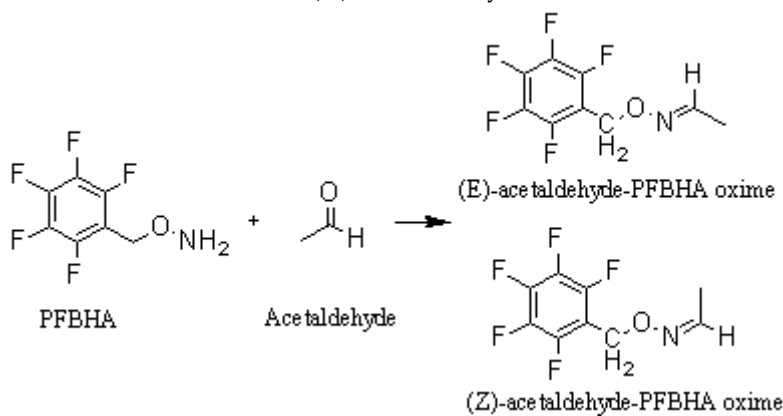

(B) Acetaldehyde

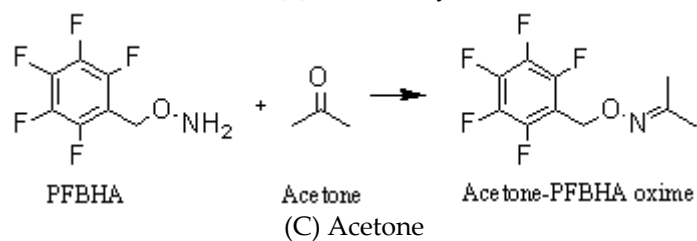

(C) Acetone

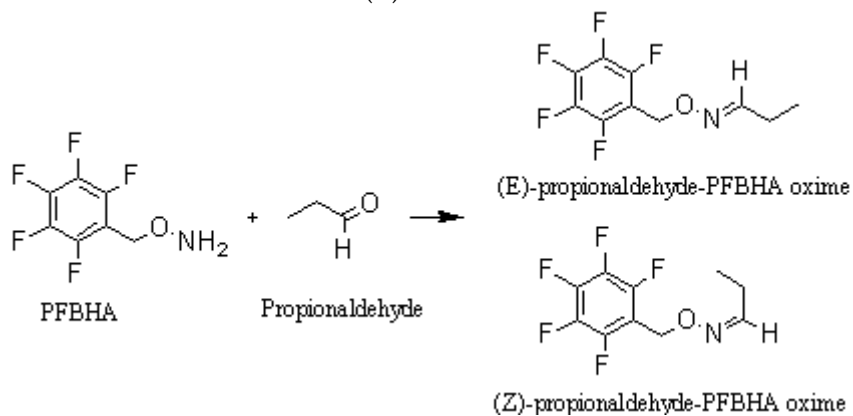

(D) Propionaldehyde

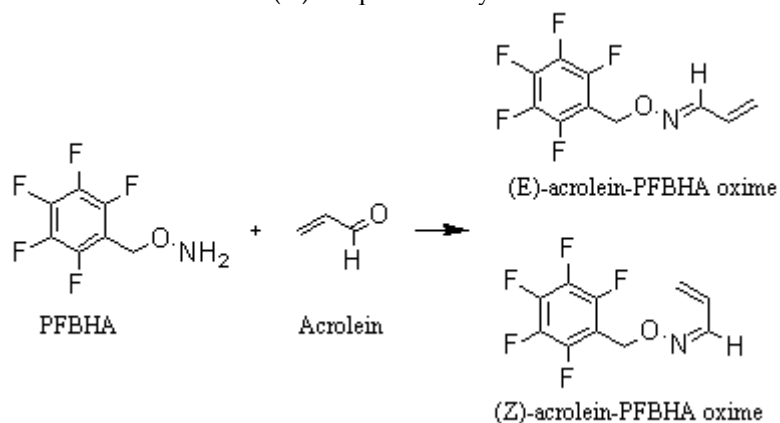

(E) Acrolein

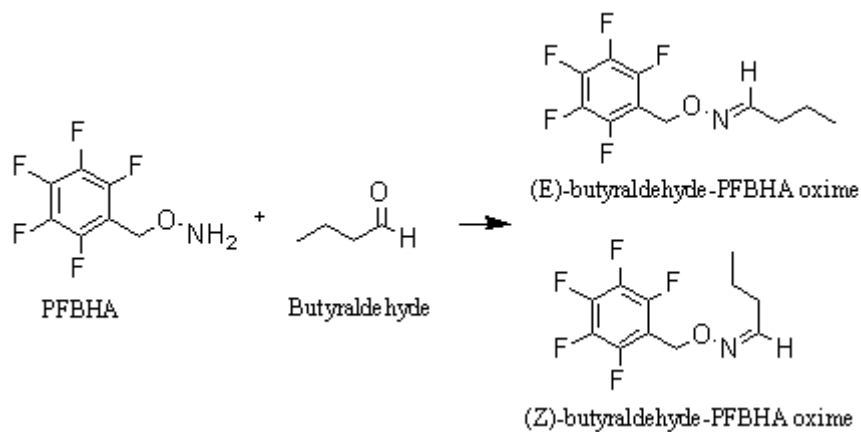

(F) Butyraldehyde

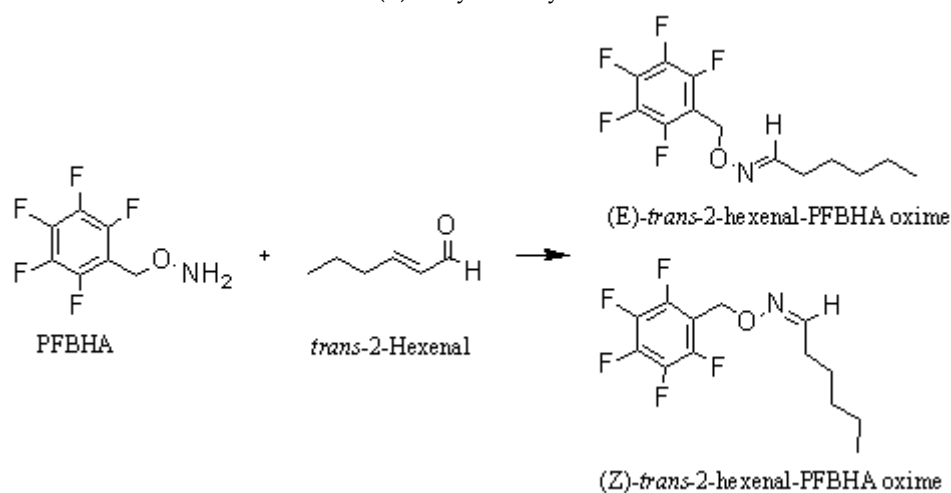

(G) *trans*-2-Hexenal

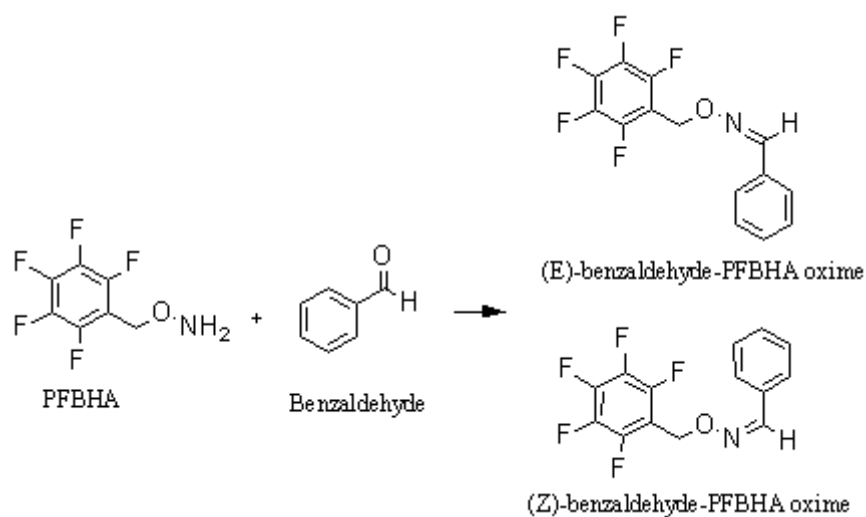

(H) Benzaldehyde

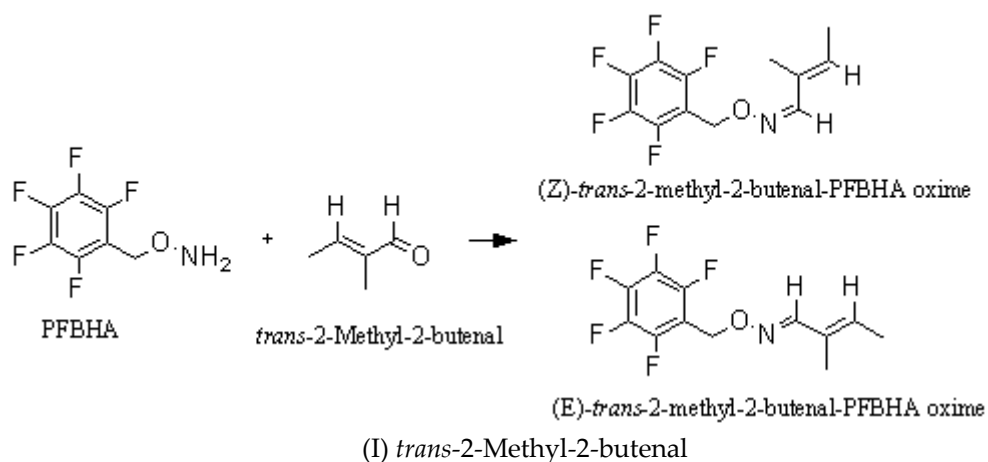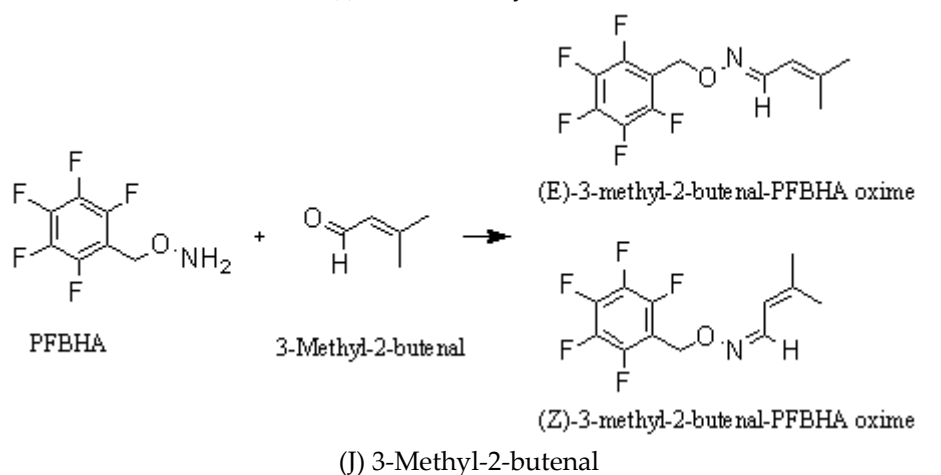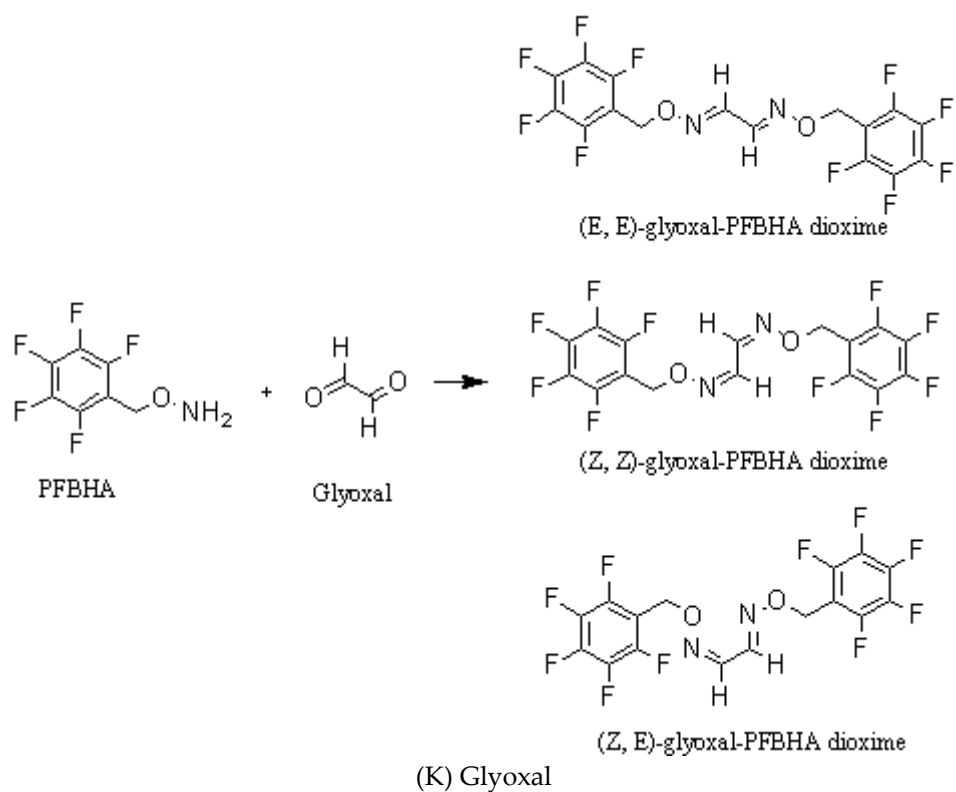

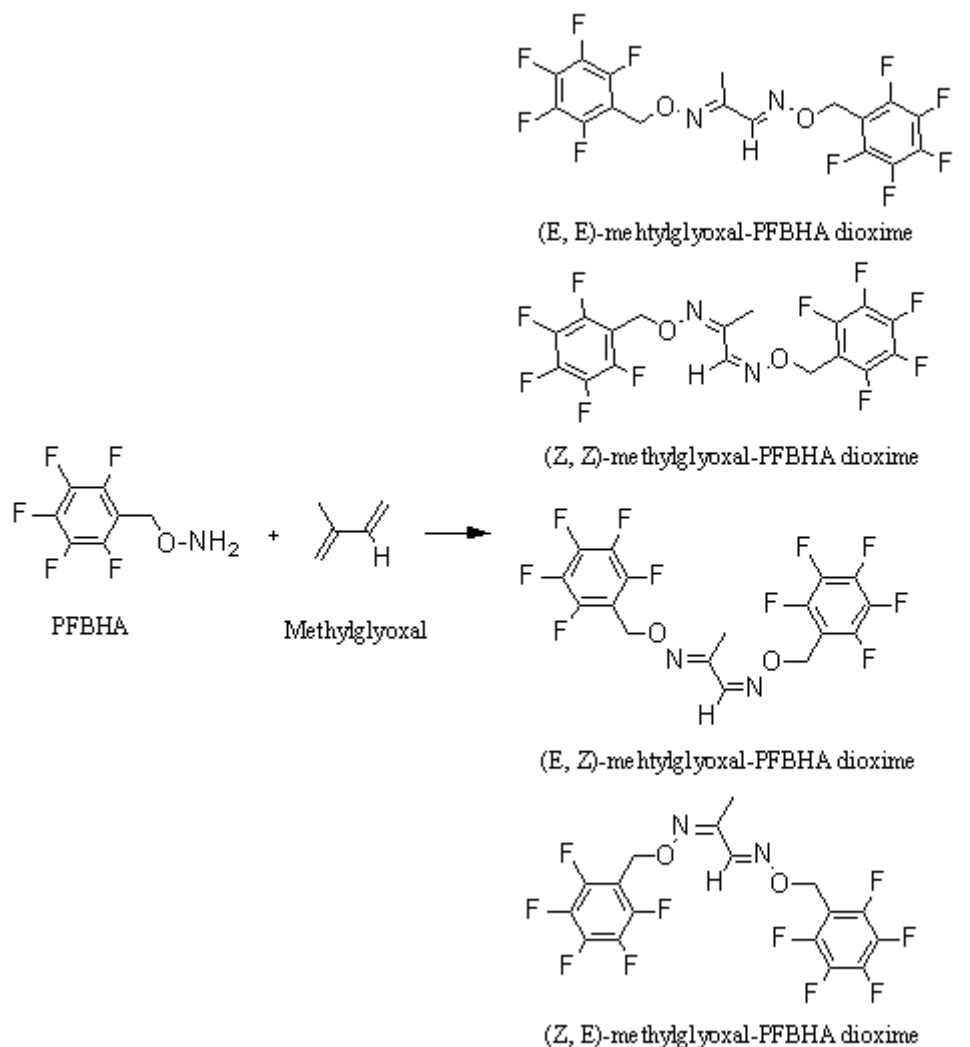

(L) Methylglyoxal

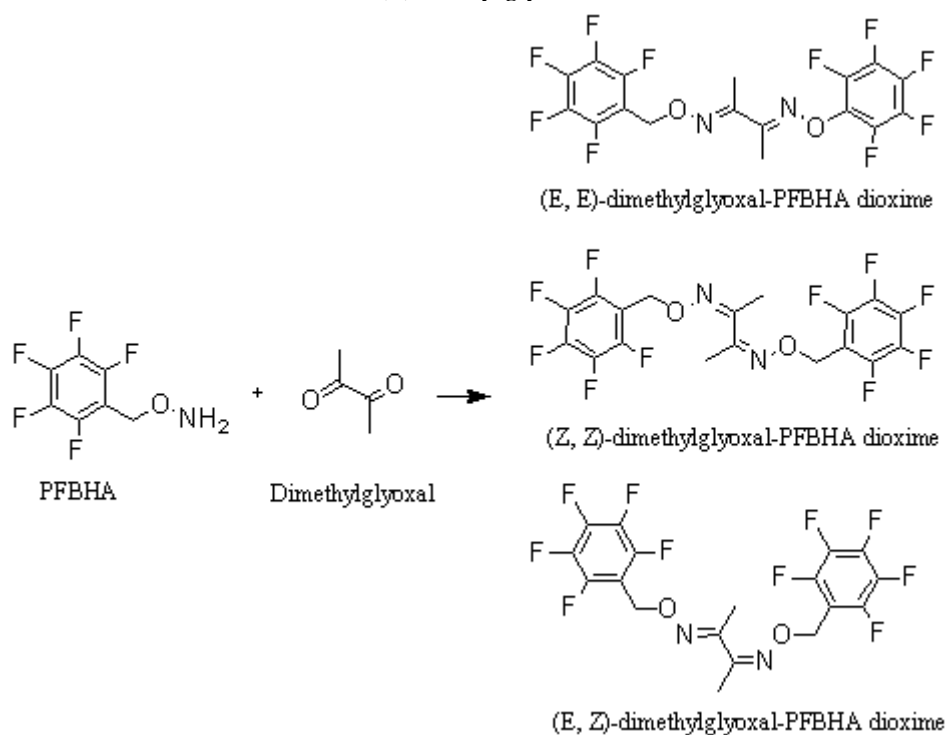

(M) Dimethylglyoxal

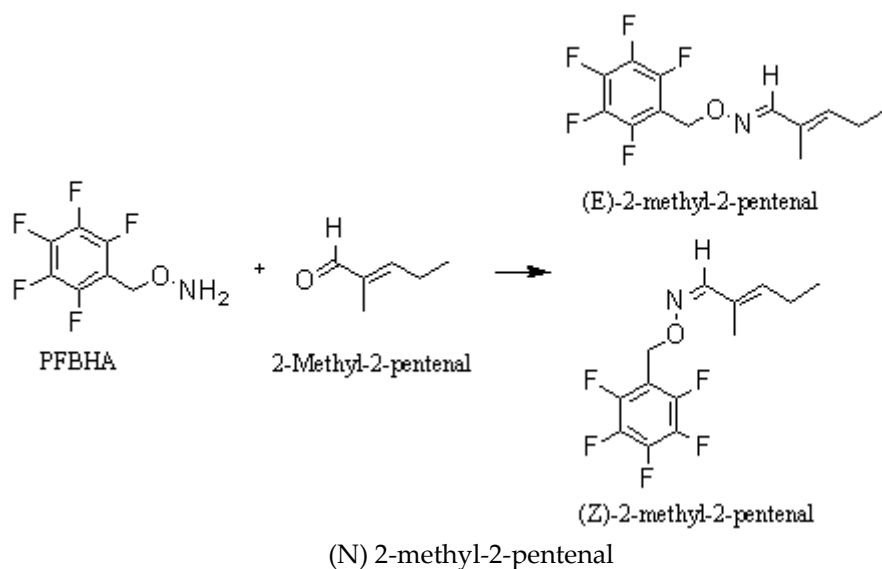

**Scheme S1.** Derivatization between carbonyls (identified in Table 1) and PFBHA, and their oxime derivatives for (A) formaldehyde, (B) acetaldehyde, (C) acetone, (D) propionaldehyde, (E) acrolein, (F) butyraldehyde, (G) *trans*-2-hexenal, (H) benzaldehyde, (I) *trans*-2-methyl-2-butenal, (J) 3-methyl-2-butenal, (K) glyoxal, (L) methylglyoxal, (M) dimethylglyoxal, and (N) 2-methyl-2-pentenal.

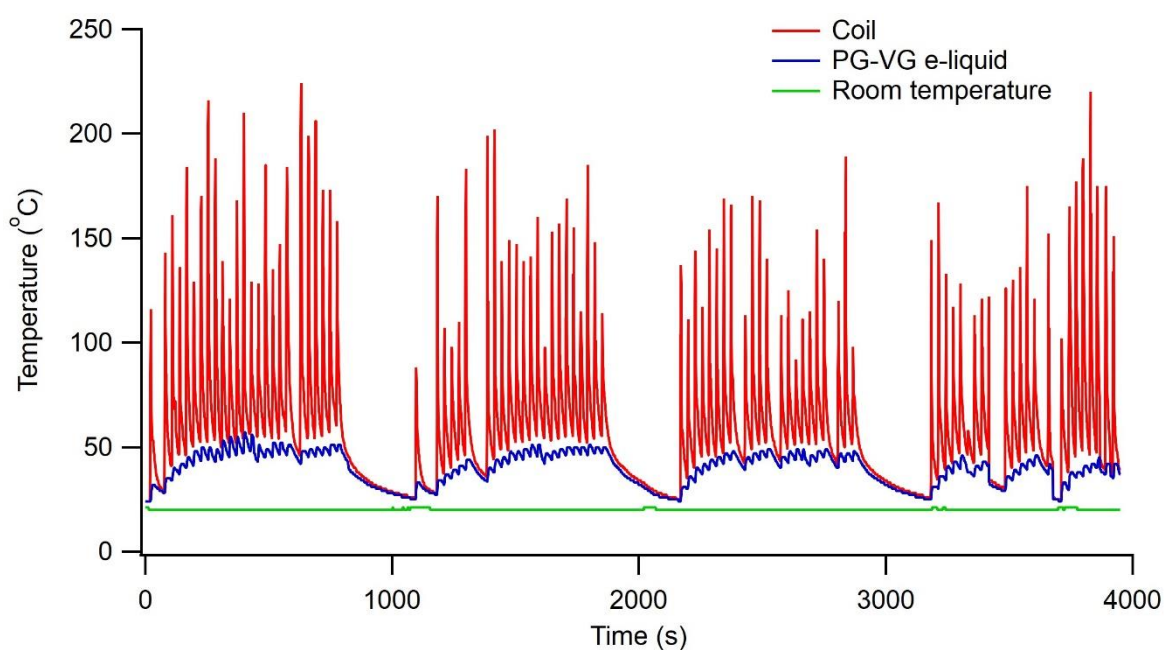

**Figure S1.** Temperature profile of the coil (red), PG-VG e-liquid (blue), and room temperature (green) measured by K-type thermocouple wires.
